# Supplementary material for: Production of ricinoleic acid-containing monoestolide triacylglycerides in an oleaginous diatom, Chaetoceros gracilis
Source: PubMed Central journal article supplement (PMC5103293; doi:10.1038/srep36809), 2016-11-10
Supplement: srep36809-s1.pdf [file srep36809-s1.pdf]

## **Production of ricinoleic acid-containing monoestolide triacylglycerides in an oleaginous diatom, *Chaetoceros gracilis***

Masataka Kajikawa<sup>1</sup>, Tatsuki Abe<sup>1</sup>, Kentaro Ifuku<sup>1</sup>, Ken-ichi Furutani<sup>1</sup>, Dongyi Yan<sup>1</sup>, Tomoyo Okuda<sup>2</sup>, Akinori Ando<sup>2</sup>, Shigenobu Kishino<sup>2</sup>, Jun Ogawa<sup>2</sup> & Hideya Fukuzawa<sup>1</sup>

<sup>1</sup>Graduate School of Biostudies, Kyoto University, Kyoto 606-8502, Japan.

<sup>2</sup>Graduate School of Agriculture, Kyoto University, Kyoto 606-8502, Japan.

Correspondence and requests for materials should be addressed to H.F.  
(email: fukuzawa@lif.kyoto-u.ac.jp)

10 20 30 40 50 60 70 80 90 100  
 NBRC6263 ATGGCTTCGGCTACTCCTGCAATGTCAGAAAACGCGAGTTCTGCGGCACAAGGCGGCCTCGACGACTGGCATCGATTACGAATCGTCGGCCGCTGTCAGT  
 EU661785 ATGGCTTCGGCTACTCCTGCAATGTCAGAAAACGCGAGTTCTGCGGCACAAGGCGGCCTCGACGACTGGCATCGATTACGAATCGTCGGCCGCTGTCAGT

110 120 130 140 150 160 170 180 190 200  
 NBRC6263 CAGCCGAATCGCCTAGAACCTCAGCCTCGTCTACATCGCTTTCGTCACCTTCTCTCTCGACGC AATGAAAAGAAAGACGAGTACGCCGCTCCTCCTTGA  
 EU661785 CAGCCGAATCGCCTAGAACCTCAGCCTCGTCTACATCGCTTTCGTCACCTTCTCTCTCGACGC AATGAAAAGAAAGACGAGTACGCCGCTCCTCCTTGA

210 220 230 240 250 260 270 280 290 300  
 NBRC6263 TAGTACGGAAAACGCTTCACGCCCCCTGACTTCAGCATCAAAGACATCCGCGTGCATTCCCAAGCATTGCTACGAACGCTTACCATCAAGAGCTAC  
 EU661785 TAGTACGGAAAACGCTTCACGCCCCCTGACTTCAGCATCAAAGACATCCGCGTGCATTCCCAAGCATTGCTACGAACGCTTACCATCAAGAGCTAC

310 320 330 340 350 360 370 380 390 400  
 NBRC6263 GCATATGTTCTTCGGATCTCCTCTGTCTTTCGACTACGTTCTACCTGTTCCACAACCTCGTAACGCCAGAGAAATACCATCCAACCCCTTCGTTTCG  
 EU661785 GCATATGTTCTTCGGATCTCCTCTGTCTTTCGACTACGTTCTACCTGTTCCACAACCTCGTAACGCCAGAGAAATACCATCCAACCCCTTCGTTTCG

410 420 430 440 450 460 470 480 490 500  
 NBRC6263 TGCTCTGGAGCATCTACACAGTACTGCAAGGTCTCTTTCGACCCGACTTTGGGTCATTGGTCATGAATGGTCACTGTGCCTTTTCCCGTCTCCCTT  
 EU661785 TGCTCTGGAGCATCTACACAGTACTGCAAGGTCTCTTTCGACCCGACTTTGGGTCATTGGTCATGAATGGTCACTGTGCCTTTTCCCGTCTCCCTT

510 520 530 540 550 560 570 580 590 600  
 NBRC6263 TATCAGCGACCTTACGGCTGGGTCACTCAGCTCTCCTCGTGCCTTATTTCACTGGAAATTTCCACAGTGCCCATCAAGGGATTGGAAAC  
 EU661785 TATCAGCGACCTTACGGCTGGGTCACTCAGCTCTCCTCGTGCCTTATTTCACTGGAAATTTCCACAGTGCCCATCAAGGGATTGGAAAC

610 620 630 640 650 660 670 680 690 700  
 NBRC6263 ATGGAGCGCGAATGGTCTTTCGCTCGGACACGCGAGCAGCAGGCCACTCGACTTGGACGCGCGGTGAGGAACTCGGCGATCTTTCGAGGAGACAC  
 EU661785 ATGGAGCGCGAATGGTCTTTCGCTCGGACACGCGAGCAGCAGGCCACTCGACTTGGACGCGCGGTGAGGAACTCGGCGATCTTTCGAGGAGACAC

710 720 730 740 750 760 770 780 790 800  
 NBRC6263 CCATTTACCGGCTCTGCATCTGGTGGTAAGCAGCTCATCGGTTGGCCAGCTACCTCATGACGAACGCCACAGGACACAATTTCCACGAACGCCAGG  
 EU661785 CCATTTACCGGCTCTGCATCTGGTGGTAAGCAGCTCATCGGTTGGCCAGCTACCTCATGACGAACGCCACAGGACACAATTTCCACGAACGCCAGG

810 820 830 840 850 860 870 880 890 900  
 NBRC6263 GGAGGTCGAGGCAAGGGCAAGAAGAACGGTTTCGGGGGGGGCGTAAATCACTTTGATCCCGCAGCCCTATTTTCGAAGCCCGACAGGCCAAGTACATT  
 EU661785 GGAGGTCGAGGCAAGGGCAAGAAGAACGGTTTCGGGGGGGGCGTAAATCACTTTGATCCCGCAGCCCTATTTTCGAAGCCCGACAGGCCAAGTACATT

910 920 930 940 950 960 970 980 990 1000  
 NBRC6263 GTTCTCTCTGACATCGGCTGGGCTTGGCCATCGCTGCTTTGGTATACCTCGGCAACCGATTGCGGCTGGGCCAACATGCTGTCTGGTACTTTTTGCCCT  
 EU661785 GTTCTCTCTGACATCGGCTGGGCTTGGCCATCGCTGCTTTGGTATACCTCGGCAACCGATTGCGGCTGGGCCAACATGCTGTCTGGTACTTTTTGCCCT

1010 1020 1030 1040 1050 1060 1070 1080 1090 1100  
 NBRC6263 ATCTCTGGGTGAACCACTGGCTCGTTGCCATTACGTTCTCCAGCACACGGATCCAACCTTGCCTCATTACAATCGCGAAGAGTGGAAATTTGTTCGTGG  
 EU661785 ATCTCTGGGTGAACCACTGGCTCGTTGCCATTACGTTCTCCAGCACACGGATCCAACCTTGCCTCATTACAATCGCGAAGAGTGGAAATTTGTTCGTGG

1110 1120 1130 1140 1150 1160 1170 1180 1190 1200  
 NBRC6263 AGGTGCTGACACATTGATCGTACTTGGGCTTCATTGGCCGCCATCTATTCCACGGCATTGCTGATACACATGCTGTCATCATTATGTCAGCCGATT  
 EU661785 AGGTGCTGACACATTGATCGTACTTGGGCTTCATTGGCCGCCATCTATTCCACGGCATTGCTGATACACATGCTGTCATCATTATGTCAGCCGATT

1210 1220 1230 1240 1250 1260 1270 1280 1290 1300  
 NBRC6263 CCTTCTAATAAGCTGACGAAGCCTCCGAGGCGATCAAGCCGATATGGGCAAGCACTATCGCTCAGACACCCGACACGGTCTGTGGGATTCTCCACG  
 EU661785 CCTTCTAATAAGCTGACGAAGCCTCCGAGGCGATCAAGCCGATATGGGCAAGCACTATCGCTCAGACACCCGACACGGTCTGTGGGATTCTCCACG

1310 1320 1330 1340 1350 1360 1370 1380 1390 1400  
 NBRC6263 CTCTTTGGAAGACTGCTCGCTGGTGGCAGTGGGTAGAGCCAGCGCCGACGCCAAGGTGCTGGCAAGGGCATCTTATTCTACCGCAACCGAAATAAAT  
 EU661785 CTCTTTGGAAGACTGCTCGCTGGTGGCAGTGGGTAGAGCCAGCGCCGACGCCAAGGTGCTGGCAAGGGCATCTTATTCTACCGCAACCGAAATAAAT

1410 1420 1430  
 NBRC6263 TGGTACGAAGCCATTTCATGAAGACTCAGTAG  
 EU661785 TGGTACGAAGCCATTTCATGAAGACTCAGTAG

**Supplementary Fig. S1:** Alignment of coding sequences of a *CpFAH* gene isolated from a *Claviceps purpurea* NBRC 6263 (in this study) and the *CpFAH* gene (NCBI/EMBL/DBJ accession number; EU661785) reported previously<sup>2</sup>. Identical nucleotides between the two sequences are boxed.

|          |                                                                                                     |     |     |     |     |     |     |     |     |     |  |
|----------|-----------------------------------------------------------------------------------------------------|-----|-----|-----|-----|-----|-----|-----|-----|-----|--|
|          | 10                                                                                                  | 20  | 30  | 40  | 50  | 60  | 70  | 80  | 90  | 100 |  |
| NBRC6263 | MASATPAMSENAVLRHKAASTTGIDYESSAAVSPAESPRTSASSTLSLSSLDANEKKDEYAGLLDTYGNAFTPPDFSIKDIRAAIPKHCYERSTIKSY  |     |     |     |     |     |     |     |     |     |  |
| EU661785 | MASATPAMSENAVLRHKAASTTGIDYESSAAVSPAESPRTSASSTLSLSSLDANEKKDEYAGLLDTYGNAFTPPDFSIKDIRAAIPKHCYERSTIKSY  |     |     |     |     |     |     |     |     |     |  |
|          | 110                                                                                                 | 120 | 130 | 140 | 150 | 160 | 170 | 180 | 190 | 200 |  |
| NBRC6263 | AYVLRDLLCLSTTFYLFHNFVTPENIPSNPLRFVLSIYTVLQGLFATGLWVIGHECGHCAFSPSPFISDLTGWVIHSALLVPYFSWKFSHSAHHKIGIN |     |     |     |     |     |     |     |     |     |  |
| EU661785 | AYVLRDLLCLSTTFYLFHNFVTPENIPSNPLRFVLSIYTVLQGLFATGLWVIGHECGHCAFSPSPFISDLTGWVIHSALLVPYFSWKFSHSAHHKIGIN |     |     |     |     |     |     |     |     |     |  |
|          | 210                                                                                                 | 220 | 230 | 240 | 250 | 260 | 270 | 280 | 290 | 300 |  |
| NBRC6263 | MERDMVFLPRTREQQATRLGRAVEELGDLCEETPIYTAHLVKGQLIGWPSYLMTNATGHNFHERQREGRGKGGKNGFGGGVNHFDPRSPIFEARQAKYI |     |     |     |     |     |     |     |     |     |  |
| EU661785 | MERDMVFLPRTREQQATRLGRAVEELGDLCEETPIYTAHLVKGQLIGWPSYLMTNATGHNFHERQREGRGKGGKNGFGGGVNHFDPRSPIFEARQAKYI |     |     |     |     |     |     |     |     |     |  |
|          | 310                                                                                                 | 320 | 330 | 340 | 350 | 360 | 370 | 380 | 390 | 400 |  |
| NBRC6263 | VLSDIGLGLAIAALVYLGNRFGWANMFWVYFLPYLWVNHVLAITFLQHTDPTLPHYNREEWNFVRGGACTIDRDLGFIGRHLFHGIADTHVVHHYVSRI |     |     |     |     |     |     |     |     |     |  |
| EU661785 | VLSDIGLGLAIAALVYLGNRFGWANMFWVYFLPYLWVNHVLAITFLQHTDPTLPHYNREEWNFVRGGACTIDRDLGFIGRHLFHGIADTHVVHHYVSRI |     |     |     |     |     |     |     |     |     |  |
|          | 410                                                                                                 | 420 | 430 | 440 | 450 | 460 | 470 |     |     |     |  |
| NBRC6263 | PFYNADEASEAIKPIMGKHYRSDTAHGPFVGFHLHALWKTARWCQWVEFSADAQGAGKILFYRNRNKLGTKPISMKTQ                      |     |     |     |     |     |     |     |     |     |  |
| EU661785 | PFYNADEASEAIKPIMGKHYRSDTAHGPFVGFHLHALWKTARWCQWVEFSADAQGAGKILFYRNRNKLGTKPISMKTQ                      |     |     |     |     |     |     |     |     |     |  |

**Supplementary Fig. S2:** Alignment of deduced amino acid sequences of CpFAH in *Claviceps purpurea* NBRC 6263 (in this study) and the CpFAH gene (NCBI/EMBL/ DDBJ accession number; EU661785) reported previously<sup>2</sup>. Identical amino acid residues between the two sequences are boxed.

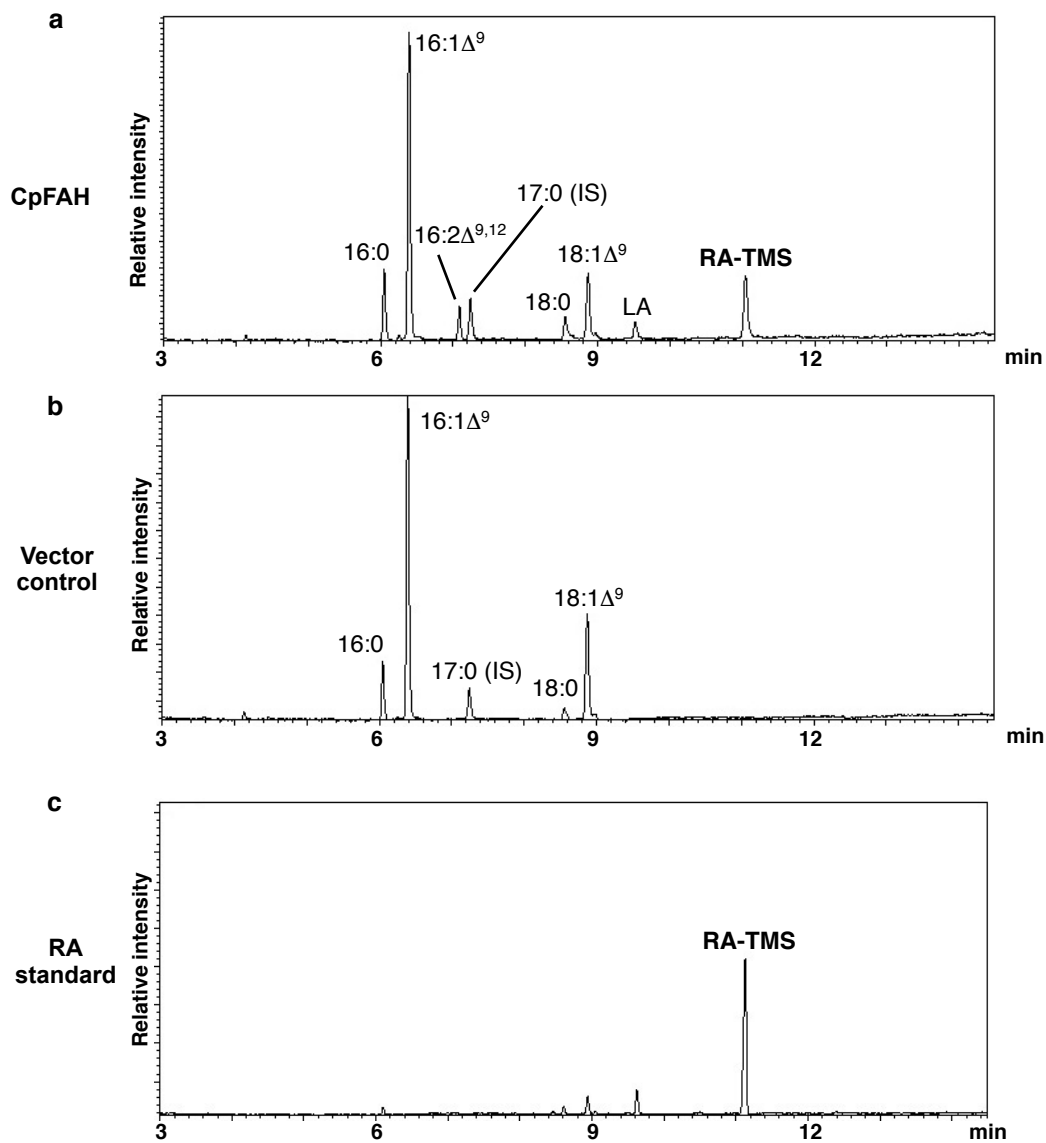

**Supplementary Fig. S3:** Gas chromatography (GC) analysis of fatty acid methyl ester (FAME)-trimethylsilyl (TMS) derivatives prepared from yeast expressing the *CpFAH* gene derived from wild-type *Claviceps purpurea* NBRC 6263 (**a**) or yeast transformed with an empty vector (**b**). TMS ester of ricinoleic acid (RA) was used as standard (**c**). LA, linoleic acid.

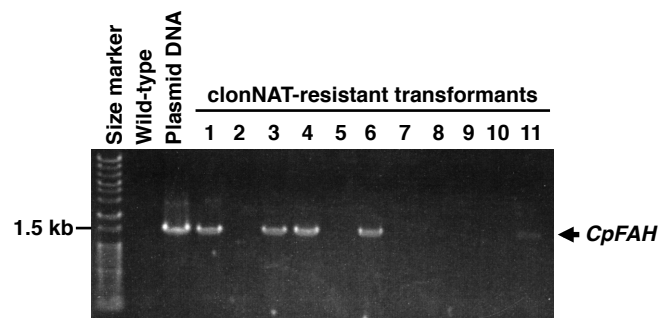

**Supplementary Fig. S4:** Genomic-PCR analysis of the transgenic *Chaetoceros gracilis* lines transformed with a *CpFAH*-expression plasmid. Size marker, 1-kb DNA size marker (Thermo Fischer Scientific); wild-type, genomic DNA from *C. gracilis* (negative control); Plasmid DNA, the expression plasmid DNA used for transformation (positive control).

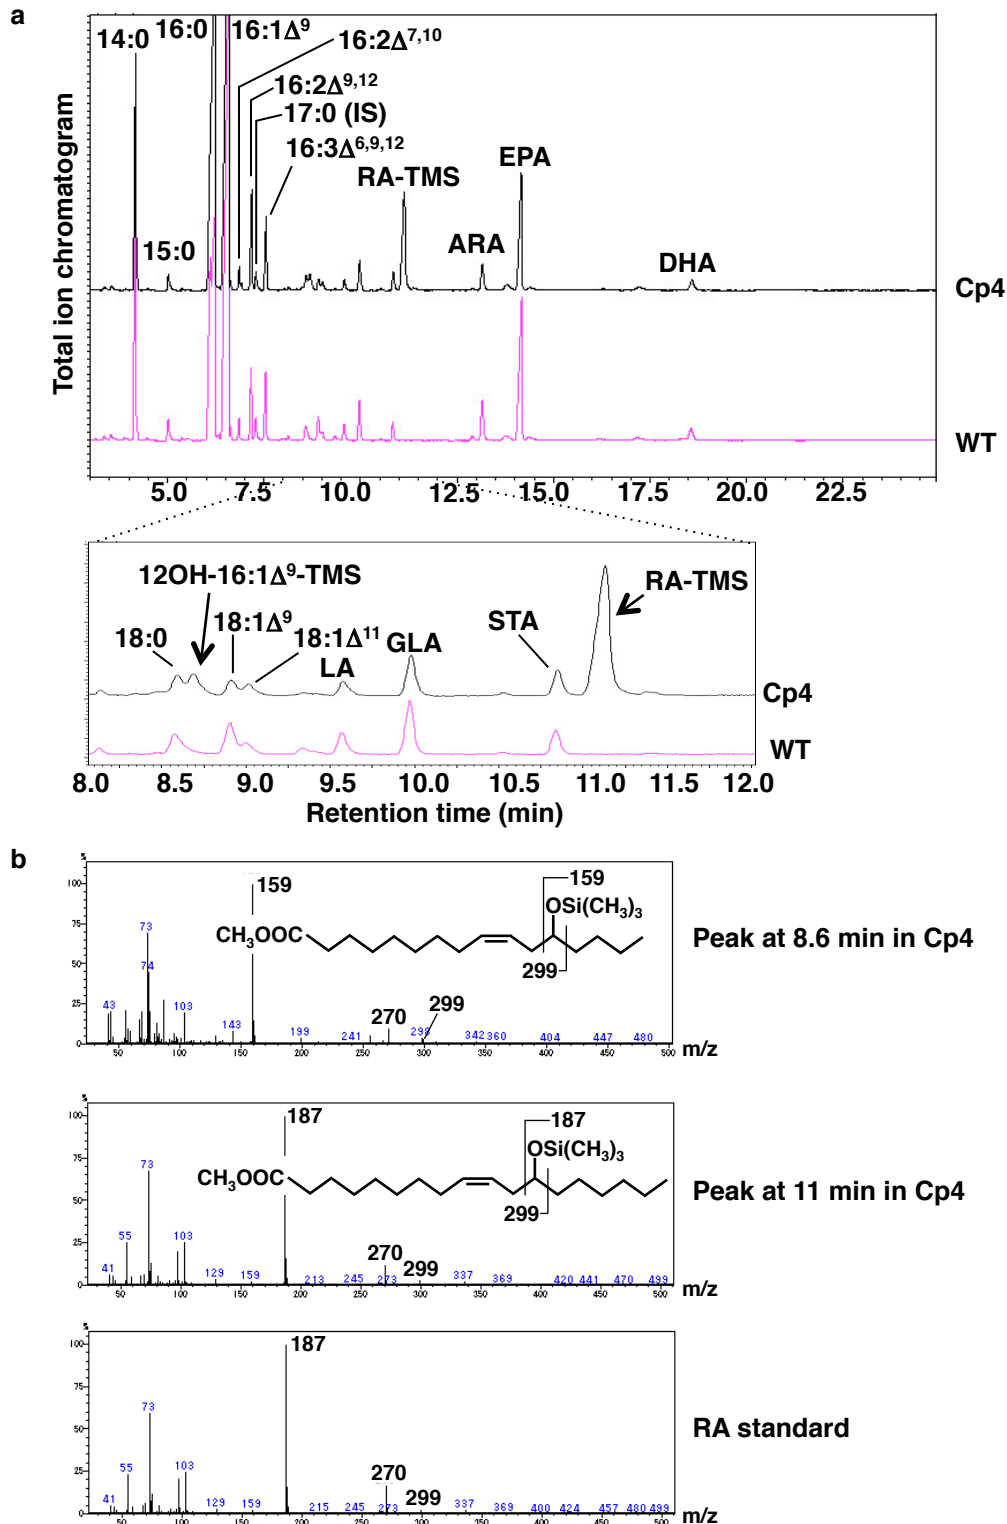

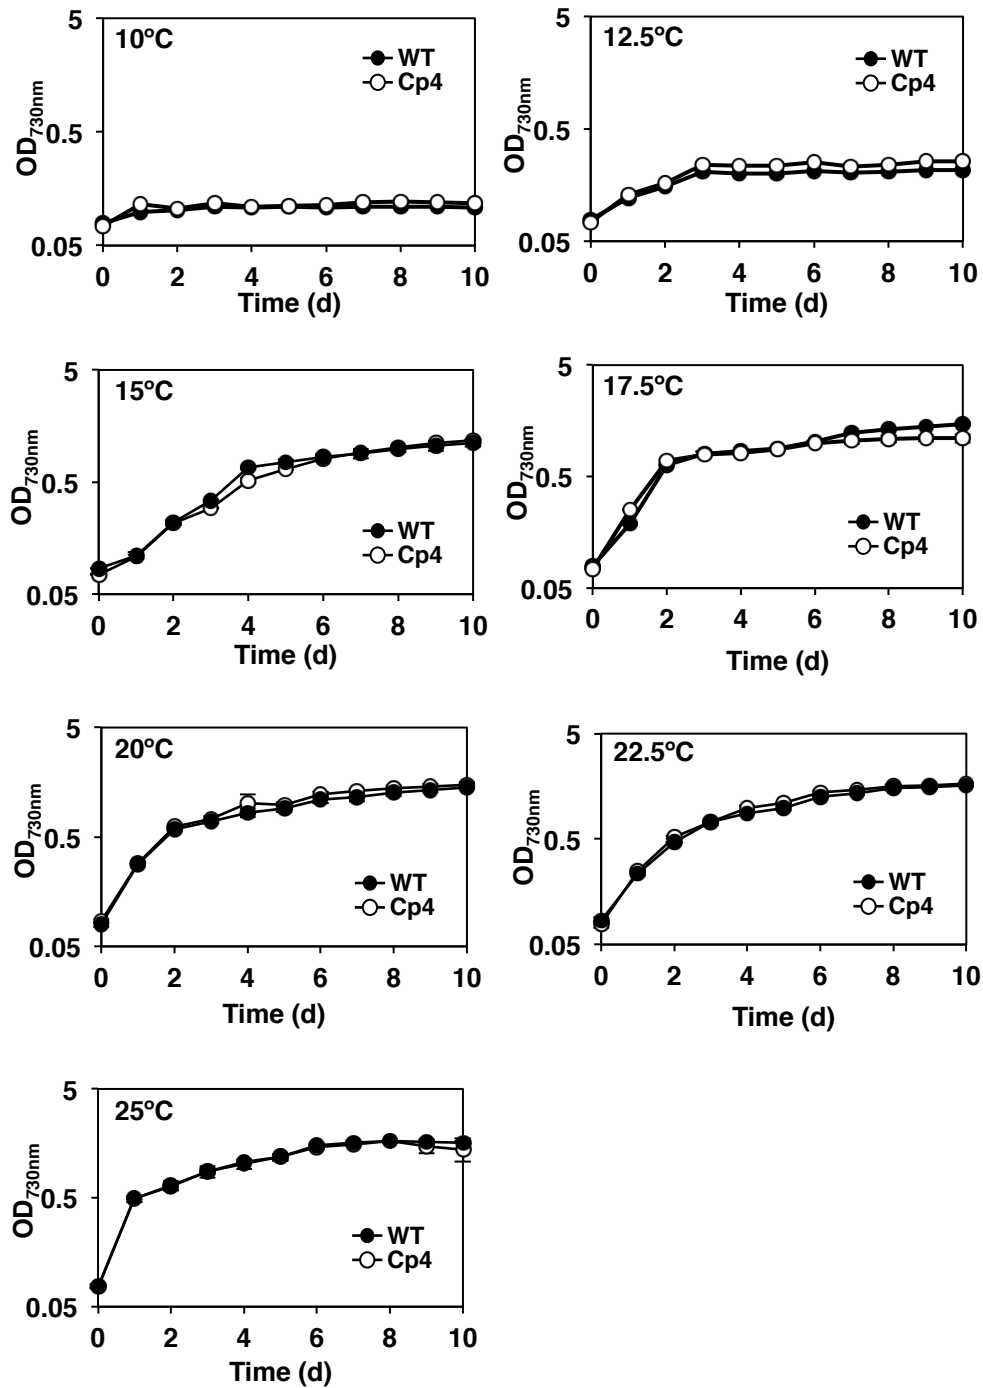

**Supplementary Fig. S6:** Growth curve of wild-type (WT) and Cp4 cells cultured at seven temperature conditions (10°C, 12.5°C, 15°C, 17.5°C, 20°C, 22.5°C, and 25°C) for 10 d.

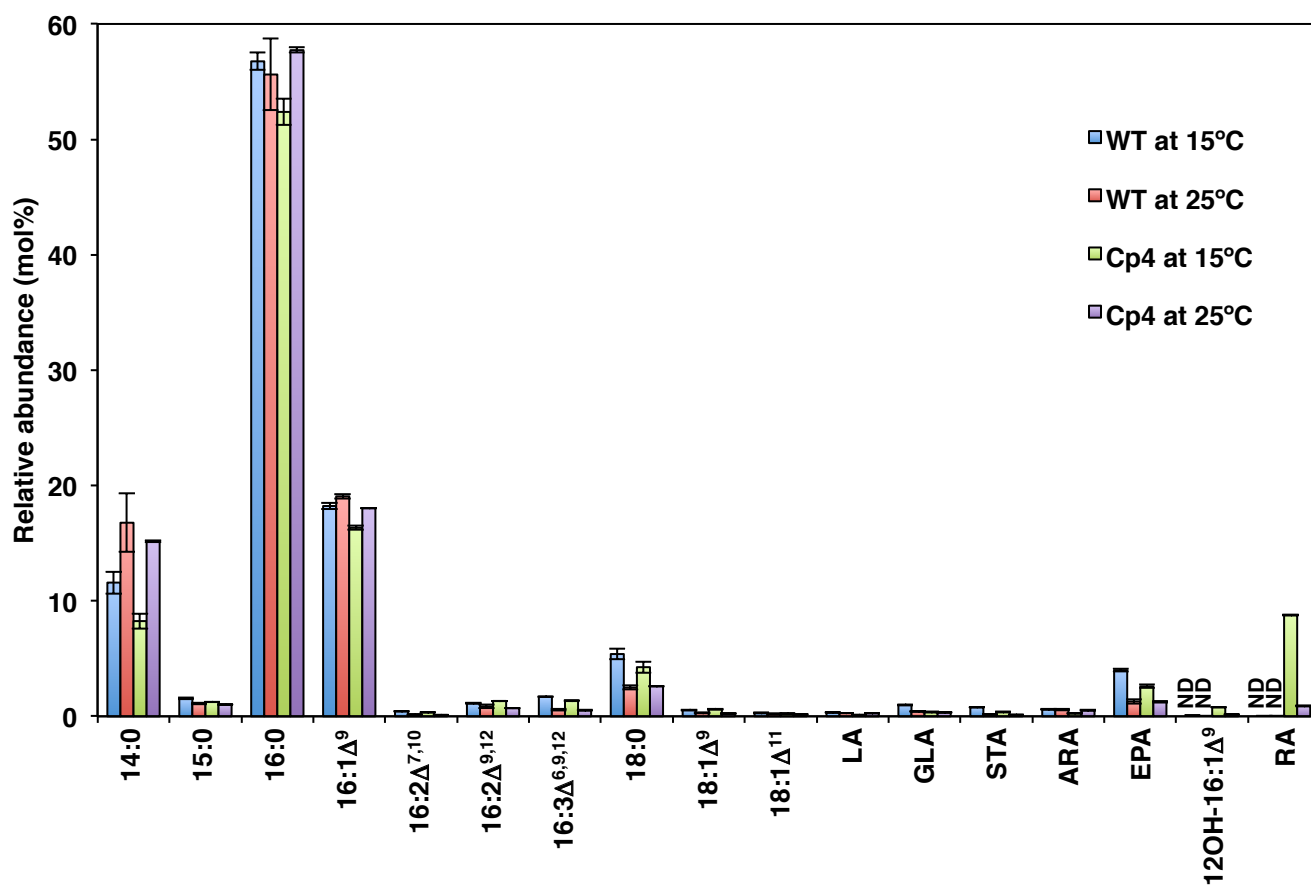

**Supplementary Fig. S7:** Fatty acid compositions of total lipids in wild-type (WT) and Cp4 cells cultured at 15°C or 25°C for 7 d. ARA, arachidonic acid; EPA, eicosapentaenoic acid; GLA,  $\gamma$ -linolenic acid, LA, linoleic acid; RA, ricinoleic acid; STA, stearidonic acid. ND, not detected.



a

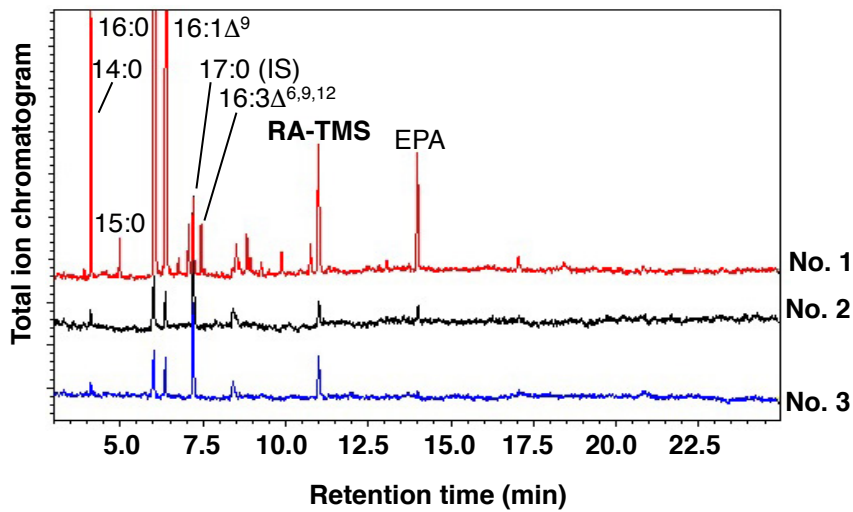

b

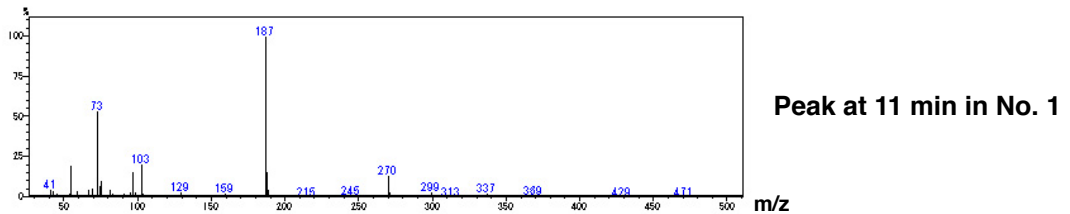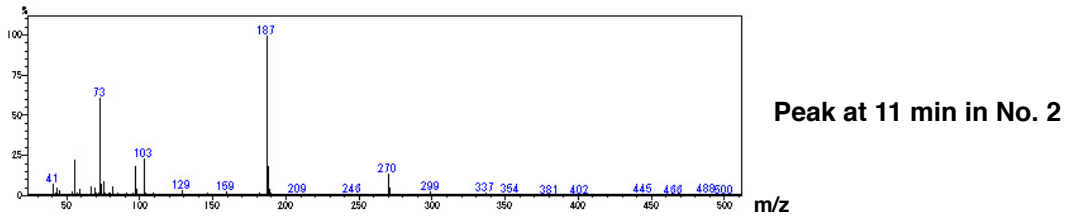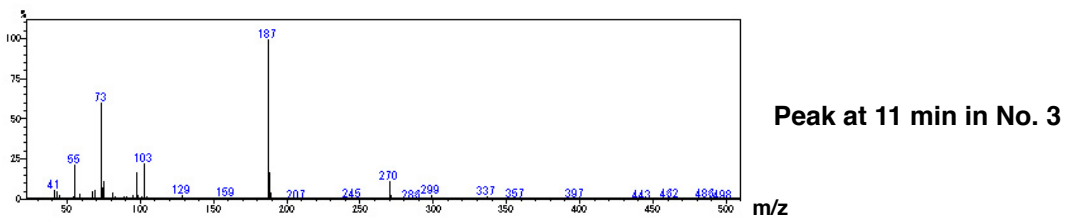

**Supplementary Fig. S8:** Gas chromatography–mass spectrometry (GC-MS) analysis of the lipids extracted from spots No. 1–3 in Cp4 cells shown in Fig. 3. (a) Total ion chromatography of fatty acid methyl ester (FAME)-trimethylsilyl (TMS) derivatives of lipids extracted from each spot. (b) MS profiles of FAME-TMS derivatives of ricinoleic acid (RA) detected at 11 min from spot Nos. 1–3, respectively. EPA, eicosapentaenoic acid; IS, internal standard; RA-TMS, trimethylsilyl ester of ricinoleic acid.

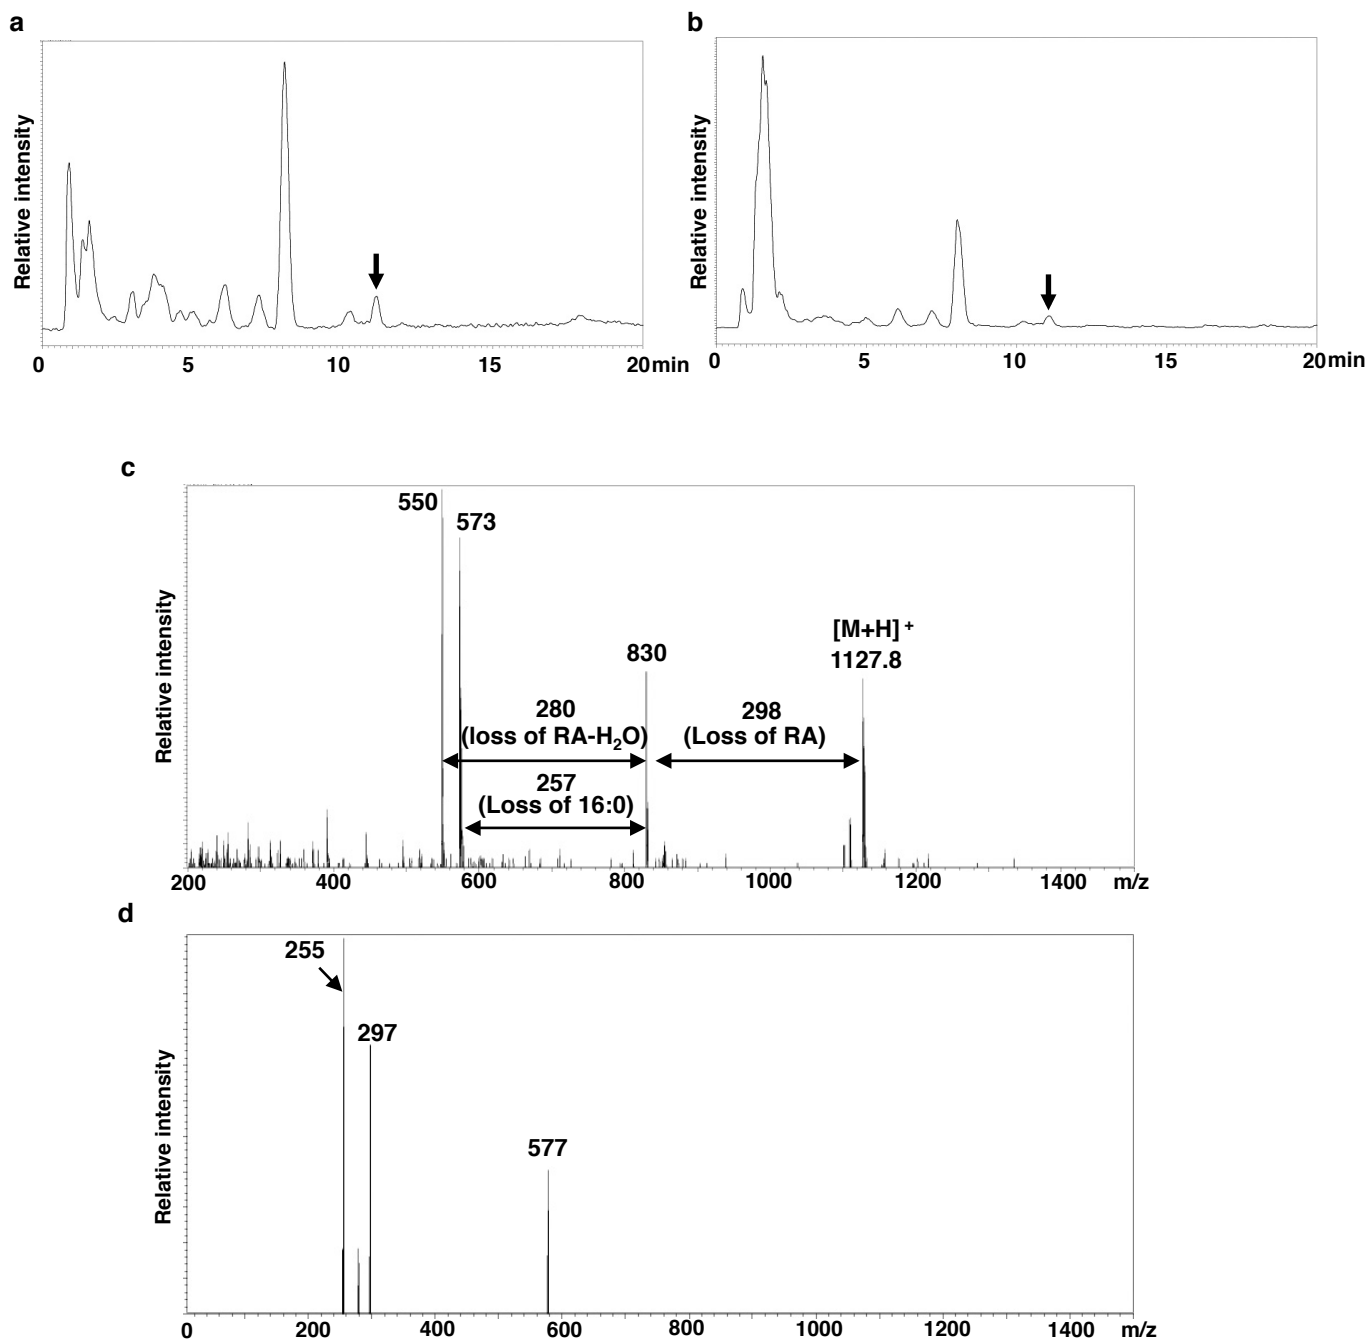

**Supplementary Fig. S9:** Liquid chromatography coupled with tandem mass spectrometry (LC-MS/MS) analysis of spot No. 2 containing ricinoleic acid (RA) in Cp4 cells shown in Fig. 3. Total ion chromatography in atmospheric pressure chemical ionisation positive (a) and negative (b) modes. (c) Full scan profile of a peak at 11.1 min indicated by arrows in (a) and (b), in electrospray ionisation (ESI) positive mode by AutoMSMS measurement. The fragment masses and ratios are consistent with an RA-RA estolide structure and two 16:0 as each side-chain fatty acid in triacylglycerol (TAG). (d) Scan profile with +45 V fragmentor voltage in ESI negative mode. Three fragment ions at  $m/z = 255$ ,  $297$ , and  $577$  corresponding to 16:0, RA, and dehydrated RA-RA estolide, respectively, were detected.

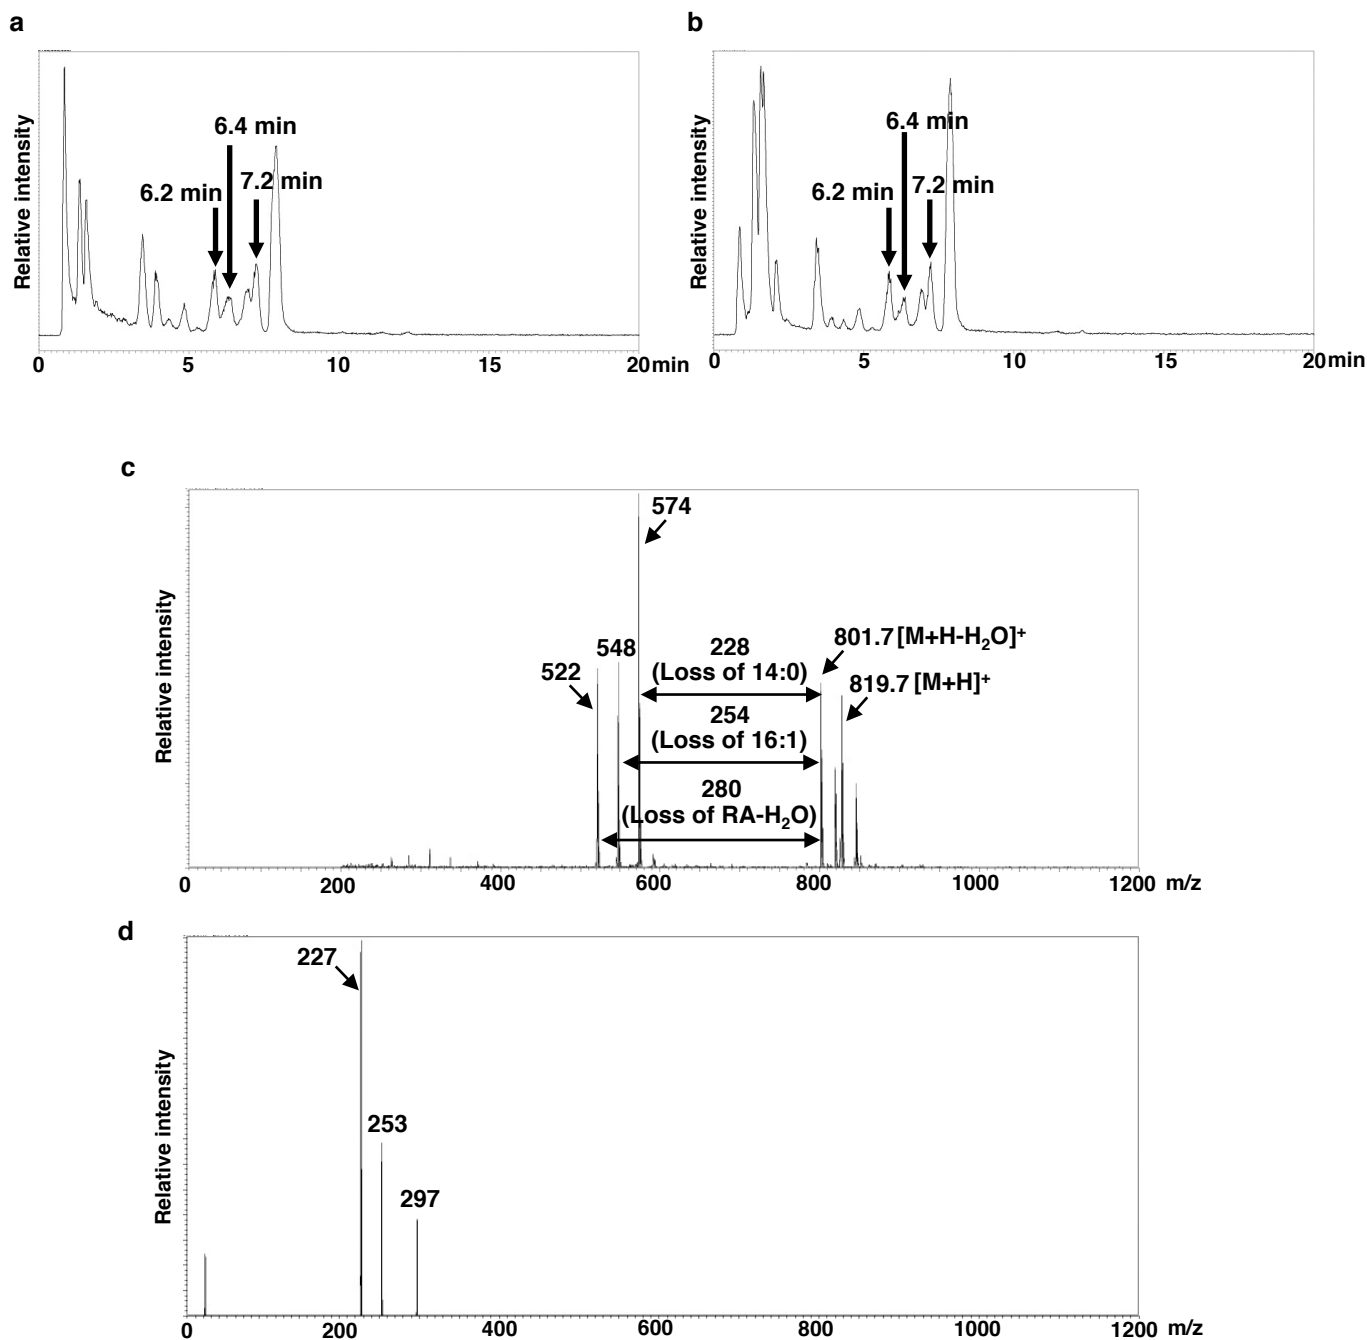

**Supplementary Fig. S10:** Liquid chromatography coupled with tandem mass spectrometry (LC-MS/MS) analysis of spot No. 3 containing ricinoleic acid (RA) in Cp4 cells shown in Fig. 3. Total ion chromatography in atmospheric pressure chemical ionisation in positive (a) and negative (b) modes. (c) Full scan profile of a peak at 6.2 min in (a) and (b), in electrospray ionisation (ESI) positive mode by AutoMSMS measurement. The fragment masses and ratios are consistent with a RA, a 14:0, and a 16:1 as each side-chain fatty acid in triacylglycerol (TAG). (d) Scan profile with +45 V fragmentor voltage in ESI negative mode. Three fragment ions at  $m/z = 227$ , 253, and 297 corresponding to 14:0, 16:1, and RA, respectively, were detected.

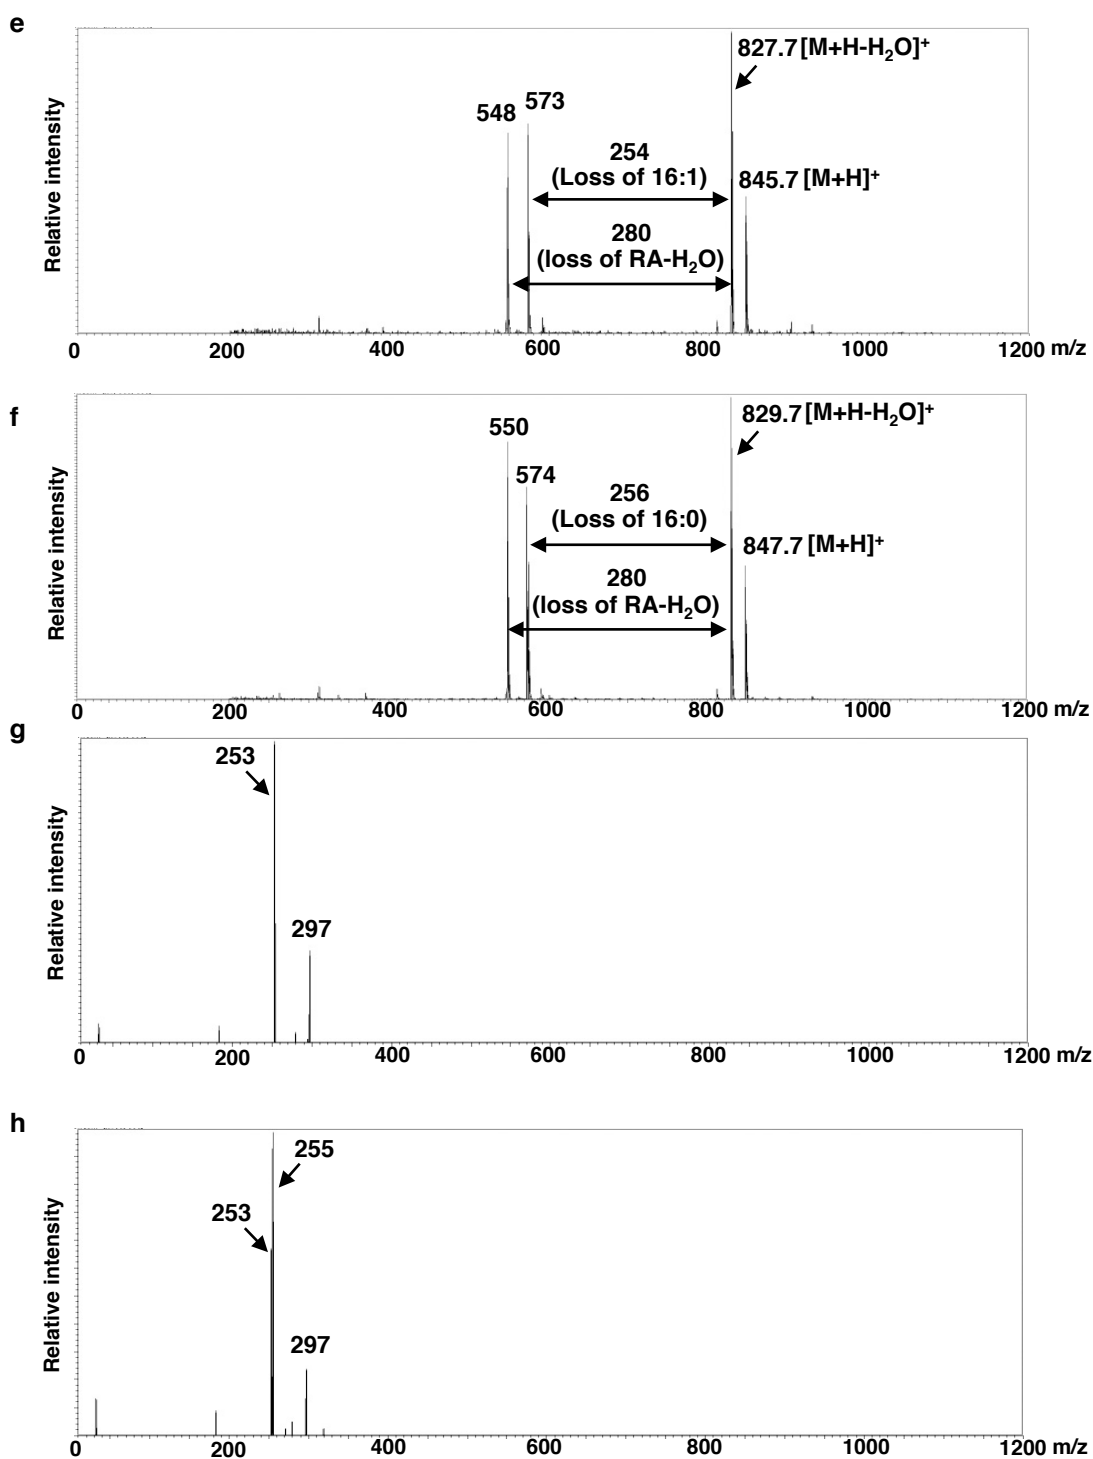

**Supplementary Fig. S10 (continued):** Full scan profile of a peak at 6.4 min (e) and 7.2 min (f) in ESI positive mode. The fragment masses and ratios were consistent with a RA, and two 16:1 for the peak at 6.4 min, and a RA, a 16:0 and a 16:1 for the peak at 7.2 min as each side-chain fatty acid in TAG. Scan profile of the peak at 6.4 min (g) and 7.2 min (h) with +45 V fragmentor voltage in ESI negative mode. Two fragment ions at m/z = 253 and 297 corresponding to 16:1 and RA were detected in the peak at 6.4 min in (g). Three fragment ions at m/z = 253, 255, and 297 corresponding to 16:1, 16:0, and RA were detected in the peak at 7.2 min in (h).

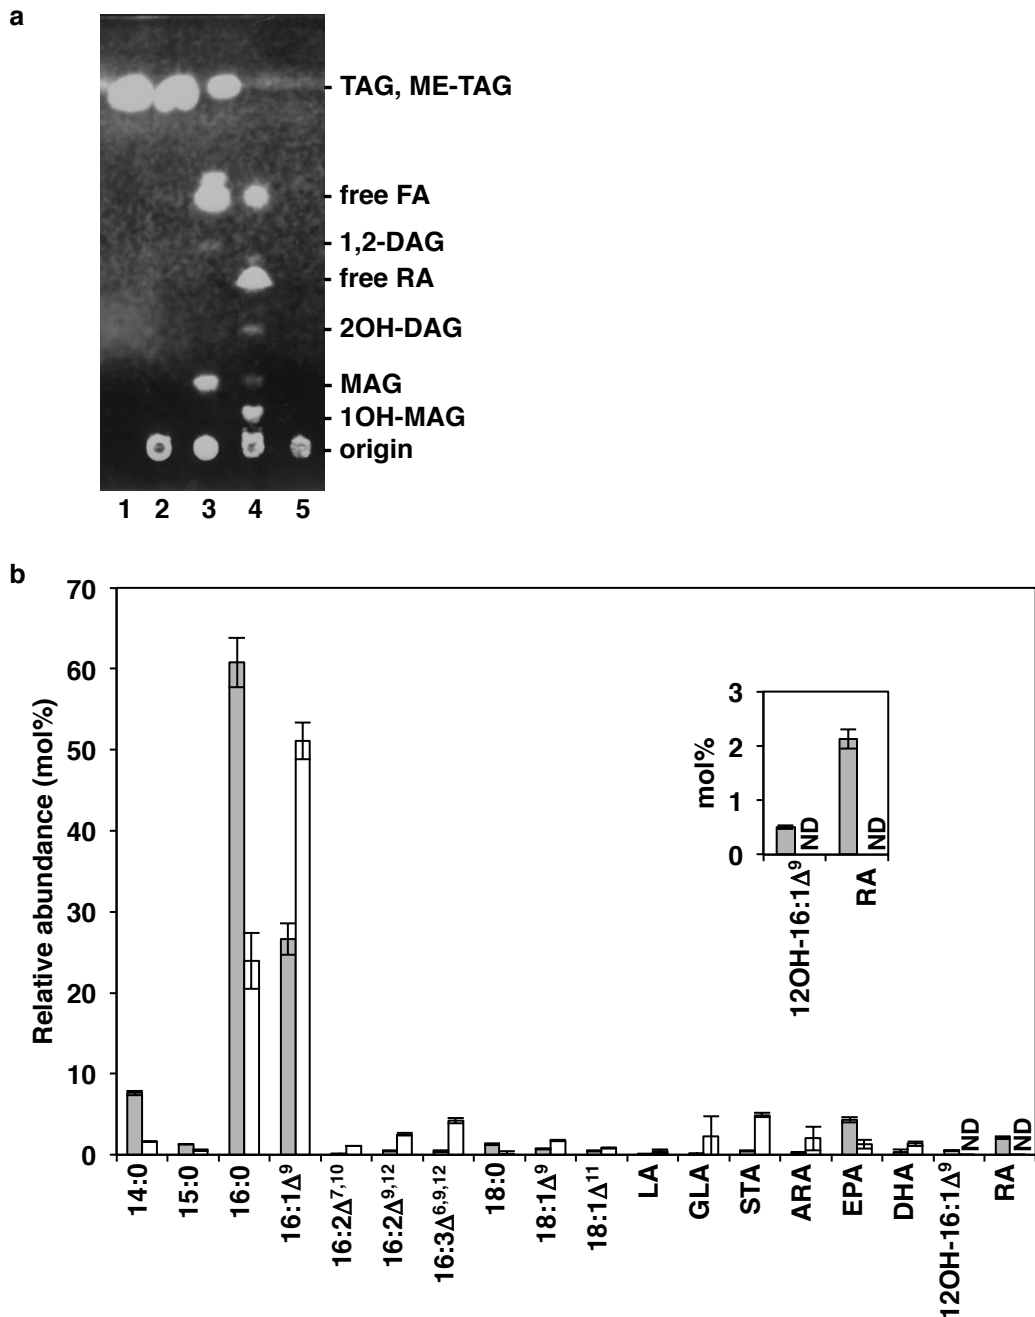

**Supplementary Fig. S11:** Positional analysis of monoestolide (ME) triacylglycerol (TAG) in Cp4 cells. **(a)** Thin layer chromatography (TLC) of purified TAG from Cp4 cells hydrolysed by *R. arrhizus* lipase. Lane 1, purified TAG. Lane 2, purified TAG incubated with reaction buffer. Lane 3, purified TAG incubated with lipase and reaction buffer. Lane 4, castor oil incubated with lipase and reaction buffer. Lane 5, mixture of lipase and reaction buffer. **(b)** Fatty acid composition of free fatty acids (grey bars) derived from the *sn-1/sn-3* position of the glyceryl backbone of TAG, and residual monoacylglycerol (MAG; open bars) containing *sn-2* position acyl groups. ARA, arachidonic acid; DHA, docosahexaenoic acid; EPA, eicosapentaenoic acid; GLA,  $\gamma$ -linolenic acid, LA, linoleic acid; RA, ricinoleic acid; STA, stearidonic acid. ND, not detected.

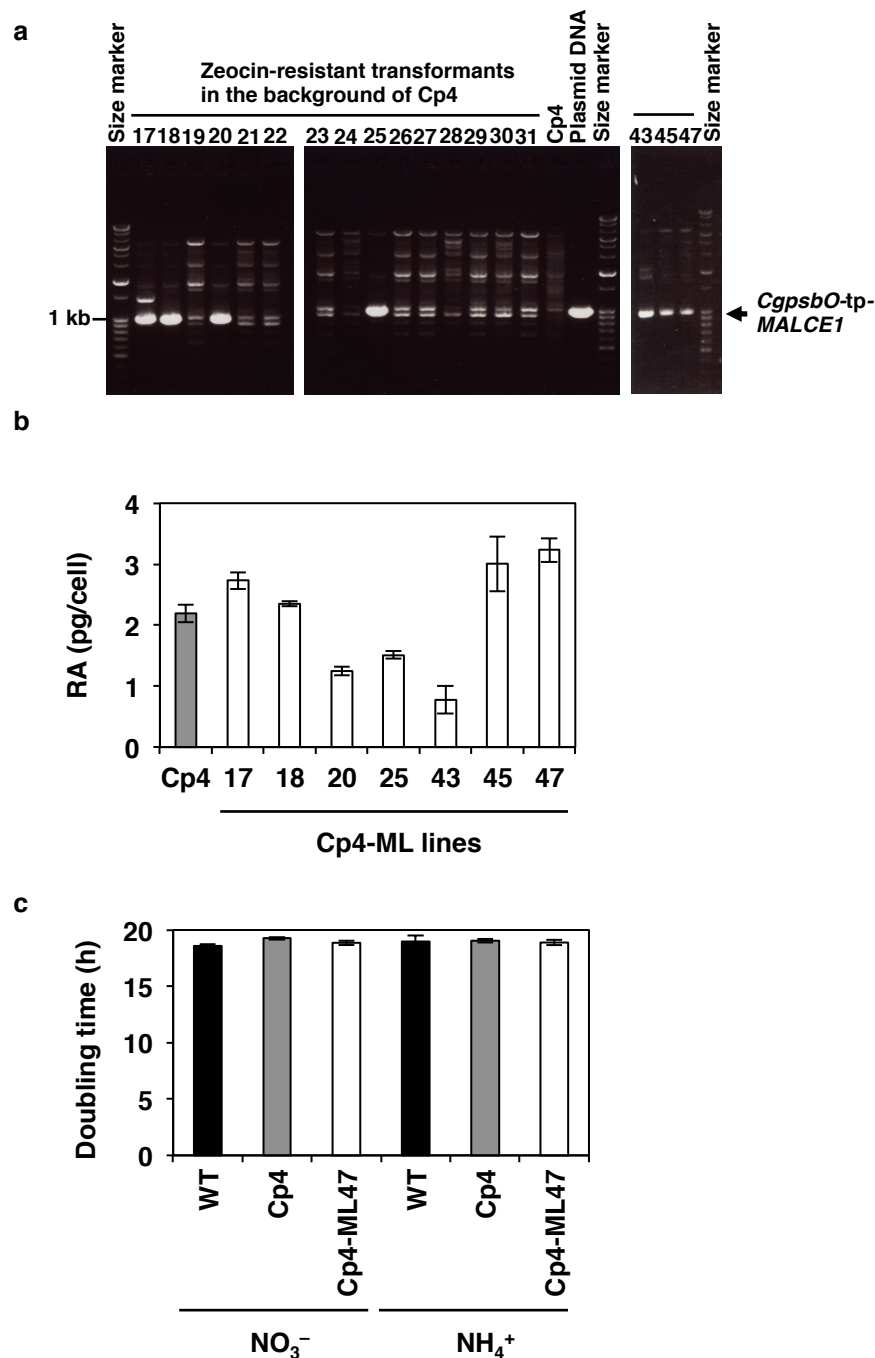

**Supplementary Fig. S12:** Screening of transgenic lines co-expressing *CpFAH* and *MALCE1* genes. **(a)** Genomic-PCR of transgenic lines containing a *MALCE1*-expression plasmid introduced into Cp4 cells. Representative results of genomic PCR for Zeocin-resistant clones No. 17–31, 43, 45, and 47 are shown. Size marker, 1-kb DNA size marker (Thermo Fischer Scientific); Cp4, genomic DNA of the Cp4 line (negative control); plasmid DNA, the expression plasmid DNA used for transformation (positive control). **(b)** Amount of ricinoleic acid (RA) in the parental Cp4 and seven transgenic lines harbouring both *CpFAH* and *MALCE1* expression plasmids cultured for 7 d at 15°C in normal Daigo's IMK medium. **(c)** Growth curve of wild-type (WT), Cp4, and Cp4-ML47 lines for 7 d at 15°C in normal Daigo's IMK medium containing NO<sub>3</sub><sup>-</sup> or modified Daigo's IMK medium containing NH<sub>4</sub><sup>+</sup>. Data in all experiments indicate mean value ± SD from three biological replicates.

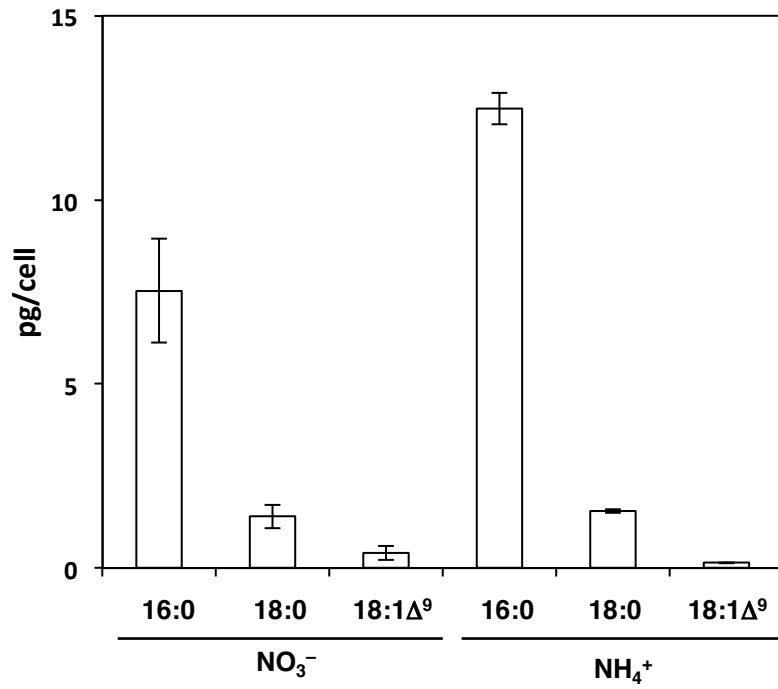

**Supplementary Fig. S13:** Contents of 16:0, 18:0, and 18:1Δ<sup>9</sup> fatty acids in Cp4-ML47 cells cultured at 15°C for 7 d in normal Daigo's IMK medium containing NO<sub>3</sub><sup>-</sup> or modified Daigo's IMK medium containing NH<sub>4</sub><sup>+</sup>.

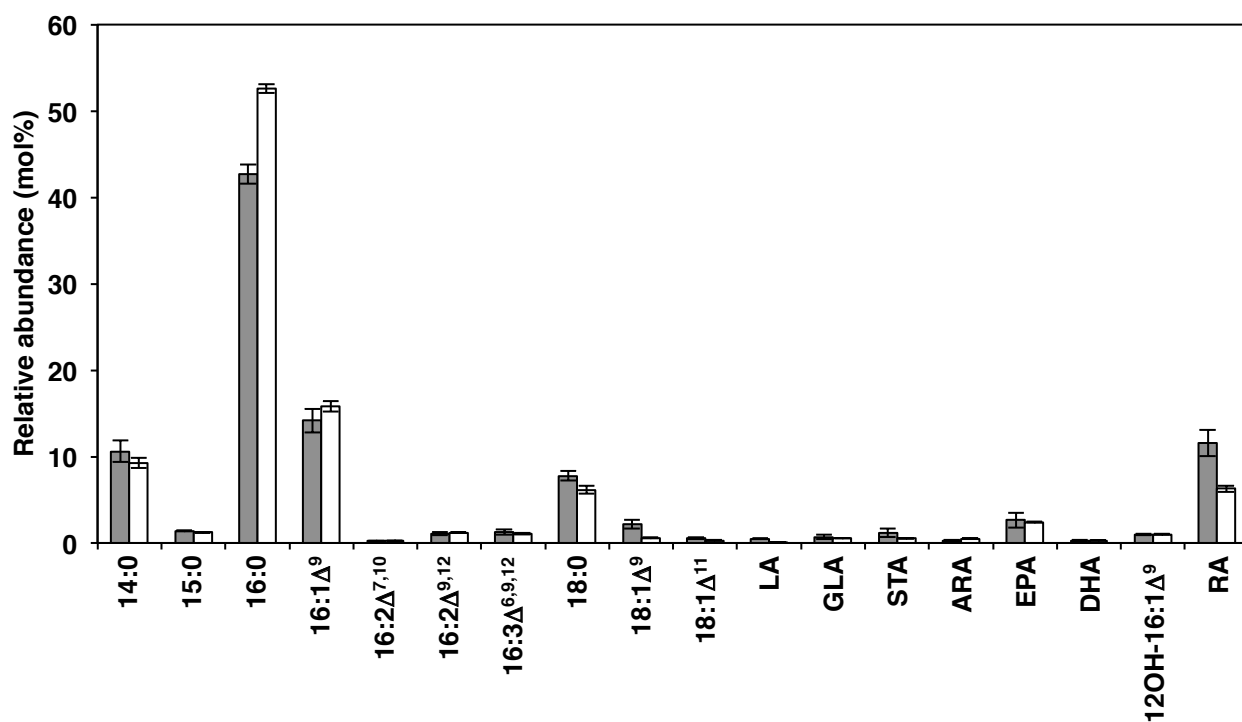

**Supplementary Fig. S14:** Fatty acid compositions of total lipids in Cp4-ML47 cells cultured at 15°C for 7 d in normal Daigo's IMK medium containing NO<sub>3</sub><sup>-</sup> (grey bars) or modified Daigo's IMK medium containing NH<sub>4</sub><sup>+</sup> (open bars). ARA, arachidonic acid; DHA, docosahexaenoic acid; EPA, eicosapentaenoic acid; GLA,  $\gamma$ -linolenic acid, LA, linoleic acid; RA, ricinoleic acid; STA, stearidonic acid.



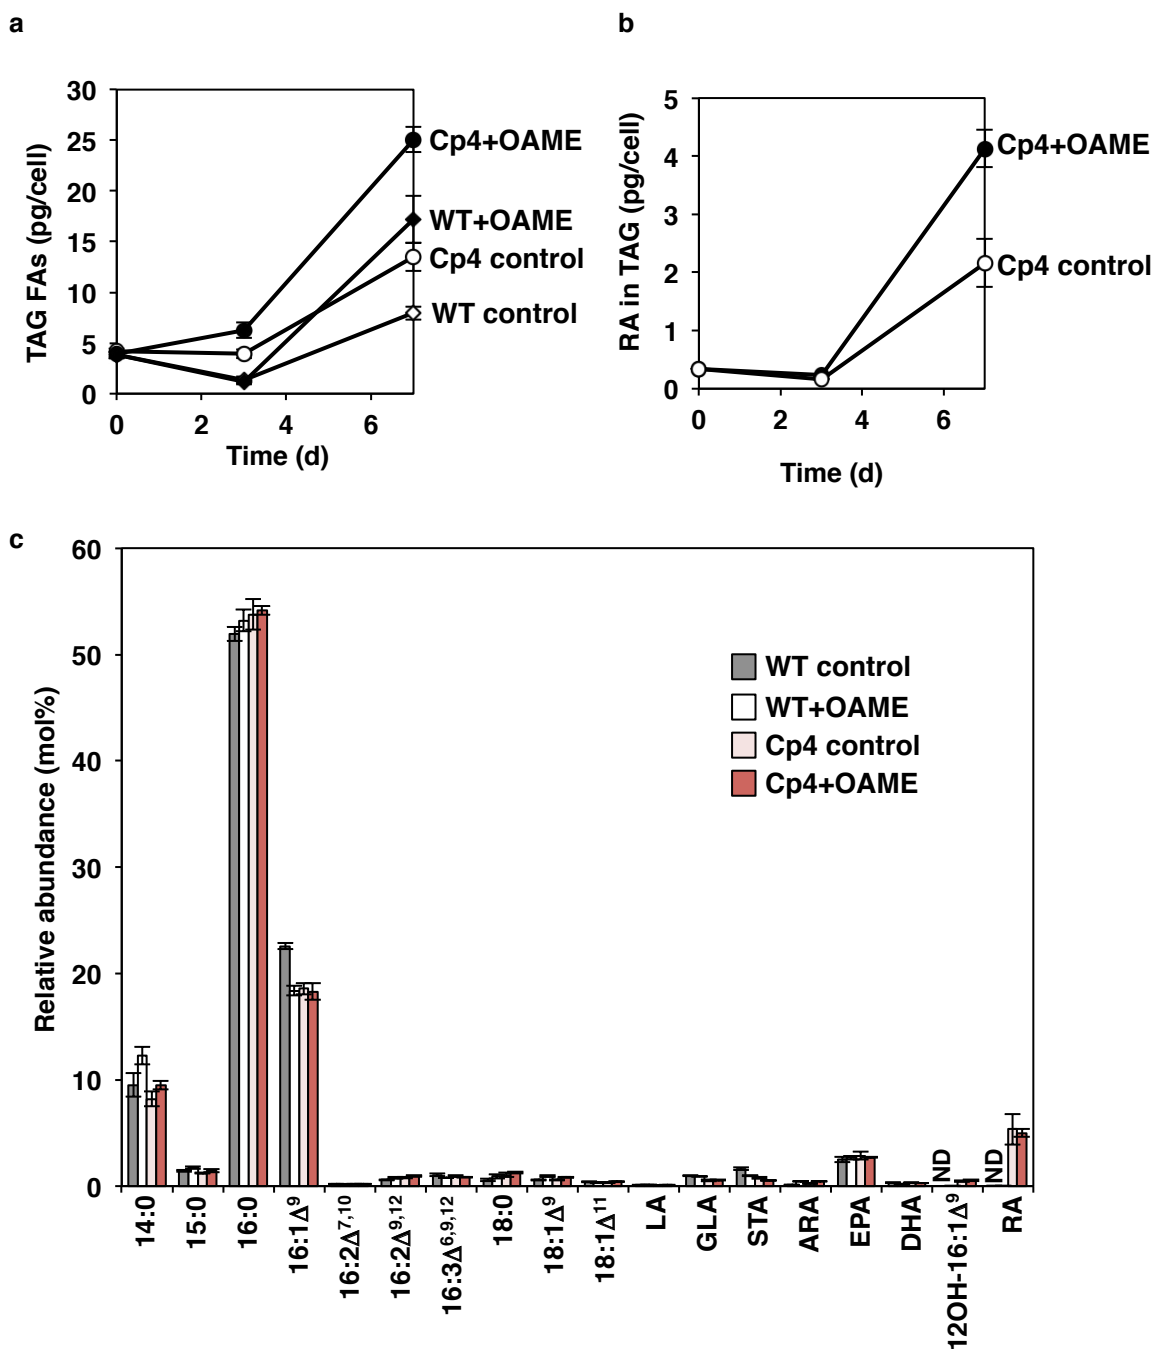

**Supplementary Fig. S15:** Effect of addition of exogenous oleic acid methyl ester (OAME) into the medium on lipid metabolism in Cp4 and wild-type (WT) cells. Changes of triacylglycerol (TAG) content (a) and ricinoleic acid (RA) content in TAG (b) per cell cultured at 15°C supplemented with OAME resolved in ethanol at final concentration 4  $\mu$ g/ml, or ethanol only as a control. (c) Fatty acid composition of TAG in WT and Cp4 cells cultured for 7 d. ARA, arachidonic acid; DHA, docosahexaenoic acid; EPA, eicosapentaenoic acid; GLA,  $\gamma$ -linolenic acid, LA, linoleic acid; RA, ricinoleic acid; STA, stearidonic acid. ND, not detected.

**Supplementary Table S1:** Primer sequences.

**For construction of *CpFAH* expression plasmid in yeast**

| Forward (5'-3')              | Reverse (5'-3')               |
|------------------------------|-------------------------------|
| CTGTATAAGCTTATGGCTTCCGCTACTC | CTGCCTTCTAGACTACTGAGTCTTCATTG |

**For genomic PCR screening of transformants harbouring pCgLhcr5p-*CpFAH* and pCgNRp/*CgpsbO*-tp-*MALCE1***

|                                          | Forward (5'-3')            | Reverse (5'-3')              |
|------------------------------------------|----------------------------|------------------------------|
| pCgLhcr5p- <i>CpFAH</i>                  | TGGGTGAACCACTGGCTCGTTGC    | TGCATGCATGCACTACTGAGTCTTC    |
| pCgNRp/ <i>CgpsbO</i> -tp- <i>MALCE1</i> | CTGCAGATGAAGCTCGCTCTTGCATC | TCTAGATTACTGAGCCTTTTTCTGCGCG |

**For construction of *CpFAH* and *MALCE1* expression plasmids**

|                                           | (5'-3')                              |
|-------------------------------------------|--------------------------------------|
| <i>CpFAH</i> - <i>Bgl</i> II-fw           | GGAAGATCTTCCATGGCTTCCGCTA            |
| <i>CpFAH</i> - <i>Nsi</i> I-rv            | TGCATGCATGCACTACTGAGTCTTC            |
| <i>InFusion</i> _NRp/ <i>CgpsbO</i> tp_fw | TTTATAAAGCGGATCCATGAAGCTCGCTCTTGCATC |
| <i>PsbO</i> signal_ <i>Afl</i> II_rv      | GTCGACTCTAGACTTAAGAGCAGCCTTTCC       |
| <i>MALCE1</i> _AflII_fw                   | CTTAAGATGGAGTCTGGACCAATGCCTG         |
| <i>MALCE1</i> _XbaI_rv                    | TCTAGATTACTGAGCCTTTTTCTG CGCG        |
| <i>Sh_ble</i> _BglII_fw                   | TCTAGATCTATGGCCAAGTTGACCAGTGCC       |
| <i>Sh_ble</i> _NsiI_rv                    | TATATGCATTCACTCCTGCTCCTCGGCCAC       |

**For qRT-PCR**

|                                     | Forward (5'-3')           | Reverse (5'-3')          |
|-------------------------------------|---------------------------|--------------------------|
| <i>CpFAH</i>                        | CTATTTTCGAAGCCCGACAG      | CCAGTGGTTCACCCAGAGAT     |
| <i>MALCE1</i>                       | CATGTTCCCAGCAATGGTCAAG    | GTAGCCTAGGGCGTTGTTCCAC   |
| <i>CgLhcr5</i>                      | ATGCCAGGAGATTATGGATTTG    | AAATTCAGATAGAGGCCAACCA   |
| <i>CgNR</i>                         | CATTCTTTCCCACGATTCTTTTATG | ATTTGACGAAATTGGAGTGTATCG |
| <i>Cg</i> $\alpha$ - <i>tubulin</i> | GCTTTATCATCCCGAGCAAA      | GTCGCATGGAACACAAGAAA     |
